# Supplementary material for: MOF-derived zirconia-supported Keggin heteropoly acid nanoporous hybrids as a reusable catalyst for methyl oleate production
Source: Royal Society of Chemistry journal article supplement (doi:10.1039/d1ra00546d), 2021-01-01
Supplement: d1ra00546d1.pdf [file d1ra00546d1.pdf]

## Electronic Supplementary Information

### MOF-derived zirconia supported Keggin heteropolys nanoporous hybrids as a reusable catalyst for methyl oleate production

Qiuyun Zhang<sup>a,b,\*</sup>, Dandan Lei<sup>a</sup>, Qizhi Luo<sup>a</sup>, Xianju Yang<sup>a</sup>, Yaping Wu<sup>a</sup>, Jialu Wang<sup>c</sup>, Yutao Zhang<sup>b,c,\*</sup>

<sup>a</sup> School of Chemistry and Chemical Engineering, Anshun University, Anshun 561000, Guizhou, China

<sup>b</sup> Engineering Technology Center of Control and Remediation of Soil Contamination of Guizhou Science and Technology Department, Anshun University, Anshun, 561000, Guizhou, China

<sup>c</sup> School of Resource and Environmental Engineering, Anshun University, Anshun, 561000, Guizhou, China

\* Correspondence: qyzhang.asu@gmail.com (Qiuyun Zhang); zyt0516@126.com (Yutao Zhang).

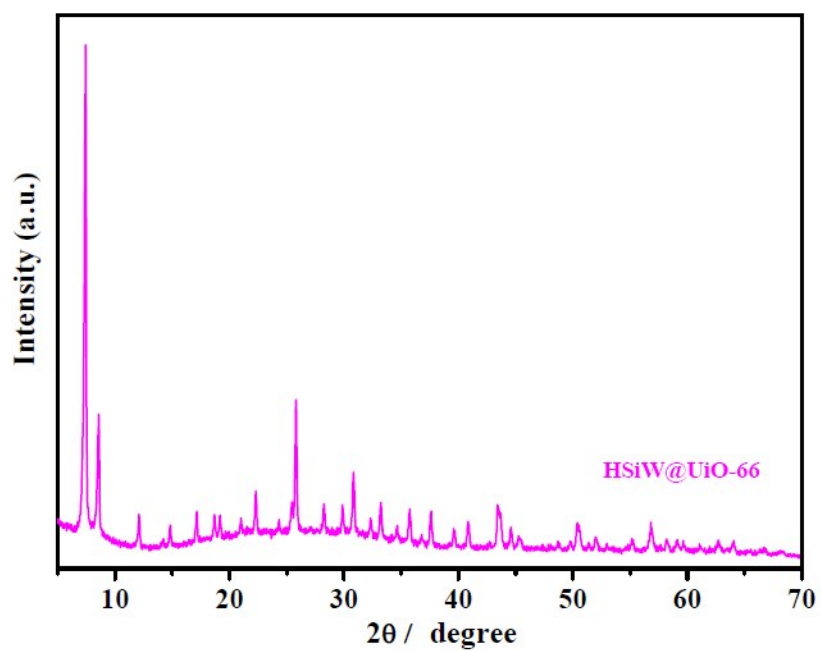

**Fig. S1** Wide-angle XRD patterns of the HSiW@UiO-66 sample
